# Supplementary material
Source: Springer Nature journal article supplement (https://www.springermedizin.de/resource/supplementary/12950_2007_64_MOESM9_ESM.pdf/9557930)

# Figure 5 (Choice 2a)

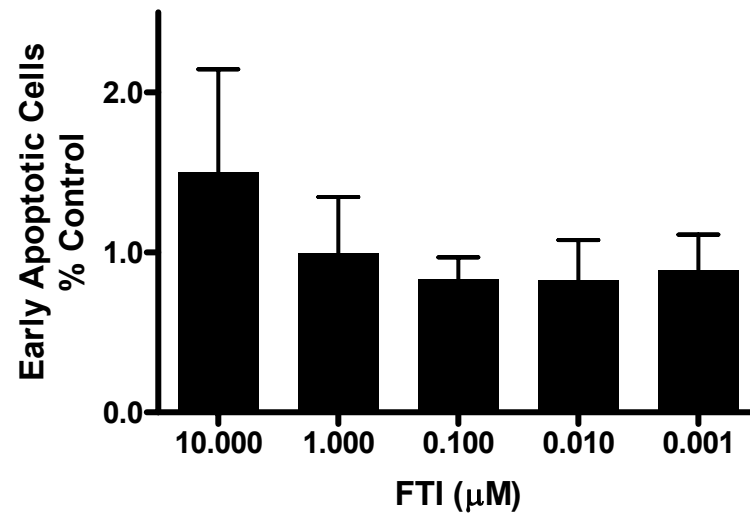

Supplement: MOESM9 [file 9557930]
